# Supplementary material for: Steerable sheath visualizable under 3D electroanatomical mapping facilitates paroxysmal atrial fibrillation ablation with minimal fluoroscopy
Source: PubMed Central journal article supplement (PMC9977702; doi:10.1007/s10840-022-01332-8), 2022-08-10
Supplement: 10840_2022_1332_MOESM1_ESM.pdf [file 10840_2022_1332_MOESM1_ESM.pdf]

**Supplemental Table. Weighted Predictors of Atrial Arrhythmia Recurrence**

| Predictor Variable                             | N   | Categorical Predictor Statistics     |                               | Continuous Predictor Statistics |                                        |
|------------------------------------------------|-----|--------------------------------------|-------------------------------|---------------------------------|----------------------------------------|
|                                                |     | Weighted Relative Risk of Recurrence | Kaplan-Meier Log-Rank P-Value | Hazard Ratio for Recurrence     | Cox Regression Wald Chi-Square P-Value |
| Patient Characteristics                        |     |                                      |                               |                                 |                                        |
| Vizigo cohort                                  | 315 | 1.03                                 | 0.9556                        |                                 |                                        |
| Age at procedure                               | 315 |                                      |                               | 1.02                            | 0.2396                                 |
| Female                                         | 315 | 0.81                                 | 0.5019                        |                                 |                                        |
| Congestive heart failure                       | 315 | 1.42                                 | 0.5197                        |                                 |                                        |
| Hypertension                                   | 315 | 1.44                                 | 0.2593                        |                                 |                                        |
| Diabetes mellitus                              | 315 | 0.50                                 | 0.1413                        |                                 |                                        |
| Prior stroke or transient ischemic attack      | 315 | 2.78                                 | 0.0003                        |                                 |                                        |
| Vascular disease                               | 315 | 0.68                                 | 0.4097                        |                                 |                                        |
| CHA <sub>2</sub> DS <sub>2</sub> -VASc score   | 315 |                                      |                               | 1.13                            | 0.2338                                 |
| Left atrial diameter                           | 229 |                                      |                               | 1.25                            | 0.4401                                 |
| Left ventricular ejection fraction             | 236 |                                      |                               | 0.99                            | 0.8208                                 |
| Ablation procedure detail                      |     |                                      |                               |                                 |                                        |
| Lesion set included any substrate modification | 310 | 4.04                                 | <0.0001                       |                                 |                                        |
| Substrate modification at posterior wall       | 315 | 3.16                                 | 0.0063                        |                                 |                                        |
| Substrate modification at mitral isthmus       | 315 | 1.26                                 | 0.7719                        |                                 |                                        |
| Acute ablation outcomes                        |     |                                      |                               |                                 |                                        |
| First pass isolation of all pulmonary veins    | 304 | 0.52                                 | 0.0595                        |                                 |                                        |
| First pass isolation of left pulmonary veins   | 307 | 0.45                                 | 0.0548                        |                                 |                                        |
| First pass isolation of right pulmonary veins  | 306 | 0.75                                 | 0.3881                        |                                 |                                        |
| Return of conduction with drug challenge       | 315 | 0.96                                 | 0.9785                        |                                 |                                        |

All observations were weighted by stabilized inverse propensity of treatment weights.
